# Supplementary material
Source: publisher figshare collection journal article supplement (https://gsajournals.figshare.com/ndownloader/files/30745015)
Supplement: Supplementary file 1 [file 30745015]

## Sheet: posProfClusterTable
geneSymbol	clustersValue	clusterID	clusterName
LOC101243553	-0.615453	2	Cyclin/Cdk
LOC108697521	-0.931946	2	Cyclin/Cdk
LOC108702942	-0.860453	2	Cyclin/Cdk
LOC108704529	-1.24454	2	Cyclin/Cdk
LOC108706476	-0.812006	2	Cyclin/Cdk
LOC108712721	-1.39012	2	Cyclin/Cdk
MGC86526.S	-1.38645	2	Cyclin/Cdk
Xelaev18018313m	-0.675511	2	Cyclin/Cdk
adamts1.L	-0.615837	2	Cyclin/Cdk
cd38.L	-1.18017	2	Cyclin/Cdk
cyr61.S	-1.06336	2	Cyclin/Cdk
myeov2.S	-0.984784	2	Cyclin/Cdk
myocd.L	-0.822182	2	Cyclin/Cdk
nr4a1	-0.868203	2	Cyclin/Cdk
nr4a1.L	-0.893423	2	Cyclin/Cdk
prkcq.L	-1.08477	2	Cyclin/Cdk
st6gal1.S	-1.38086	2	Cyclin/Cdk
zfp36.S	-0.924008	2	Cyclin/Cdk
znf534.L	-0.84531	2	Cyclin/Cdk
LOC101243553	-0.343628	2	Cyclin/Cdk
LOC108697521	-0.643231	2	Cyclin/Cdk
LOC108702942	-0.820909	2	Cyclin/Cdk
LOC108704529	-0.369446	2	Cyclin/Cdk
LOC108706476	-0.561935	2	Cyclin/Cdk
LOC108712721	0.0270744	2	Cyclin/Cdk
MGC86526.S	0.629198	2	Cyclin/Cdk
Xelaev18018313m	-0.359062	2	Cyclin/Cdk
adamts1.L	-0.37235	2	Cyclin/Cdk
cd38.L	0.0321088	2	Cyclin/Cdk
cyr61.S	-0.392217	2	Cyclin/Cdk
myeov2.S	0.160379	2	Cyclin/Cdk
myocd.L	0.283101	2	Cyclin/Cdk
nr4a1	-0.669694	2	Cyclin/Cdk
nr4a1.L	-0.70675	2	Cyclin/Cdk
prkcq.L	-0.481994	2	Cyclin/Cdk
st6gal1.S	0.534479	2	Cyclin/Cdk
zfp36.S	-0.515981	2	Cyclin/Cdk
znf534.L	-0.607739	2	Cyclin/Cdk
LOC101243553	1.49029	2	Cyclin/Cdk
LOC108697521	1.27602	2	Cyclin/Cdk
LOC108702942	1.13414	2	Cyclin/Cdk
LOC108704529	0.885001	2	Cyclin/Cdk
LOC108706476	1.42216	2	Cyclin/Cdk
LOC108712721	0.944103	2	Cyclin/Cdk
MGC86526.S	0.823122	2	Cyclin/Cdk
Xelaev18018313m	1.48672	2	Cyclin/Cdk
adamts1.L	1.49255	2	Cyclin/Cdk
cd38.L	1.2622	2	Cyclin/Cdk
cyr61.S	1.30054	2	Cyclin/Cdk
myeov2.S	1.32452	2	Cyclin/Cdk
myocd.L	1.29389	2	Cyclin/Cdk
nr4a1	1.32355	2	Cyclin/Cdk
nr4a1.L	1.25945	2	Cyclin/Cdk
prkcq.L	1.20975	2	Cyclin/Cdk
st6gal1.S	0.897199	2	Cyclin/Cdk
zfp36.S	1.3693	2	Cyclin/Cdk
znf534.L	1.38243	2	Cyclin/Cdk
LOC101243553	-0.531207	2	Cyclin/Cdk
LOC108697521	0.299155	2	Cyclin/Cdk
LOC108702942	0.547219	2	Cyclin/Cdk
LOC108704529	0.728981	2	Cyclin/Cdk
LOC108706476	-0.0482222	2	Cyclin/Cdk
LOC108712721	0.418939	2	Cyclin/Cdk
MGC86526.S	-0.0658697	2	Cyclin/Cdk
Xelaev18018313m	-0.452143	2	Cyclin/Cdk
adamts1.L	-0.504367	2	Cyclin/Cdk
cd38.L	-0.11414	2	Cyclin/Cdk
cyr61.S	0.155042	2	Cyclin/Cdk
myeov2.S	-0.500118	2	Cyclin/Cdk
myocd.L	-0.754804	2	Cyclin/Cdk
nr4a1	0.214344	2	Cyclin/Cdk
nr4a1.L	0.340727	2	Cyclin/Cdk
prkcq.L	0.35701	2	Cyclin/Cdk
st6gal1.S	-0.0508146	2	Cyclin/Cdk
zfp36.S	0.0706913	2	Cyclin/Cdk
znf534.L	0.0706164	2	Cyclin/Cdk
LOC108695787	0.769438	5	PI3K-AKT/St55a
LOC108696321	1.05176	5	PI3K-AKT/St55a
LOC108702783	0.170803	5	PI3K-AKT/St55a
LOC108704169	0.968994	5	PI3K-AKT/St55a
LOC108704892	0.8393	5	PI3K-AKT/St55a
LOC108704915	0.908626	5	PI3K-AKT/St55a
LOC108706593	0.0987579	5	PI3K-AKT/St55a
LOC108706998	1.25231	5	PI3K-AKT/St55a
LOC108708494	1.00664	5	PI3K-AKT/St55a
LOC108708501	1.33522	5	PI3K-AKT/St55a
LOC108709815	1.12311	5	PI3K-AKT/St55a
LOC108711179	0.606406	5	PI3K-AKT/St55a
LOC108716914	0.94218	5	PI3K-AKT/St55a
LOC108717842	0.762162	5	PI3K-AKT/St55a
LOC108718095	0.470482	5	PI3K-AKT/St55a
LOC398292	0.989825	5	PI3K-AKT/St55a
MGC83023	0.741616	5	PI3K-AKT/St55a
Xelaev18007686m	1.17087	5	PI3K-AKT/St55a
Xelaev18021201m	1.13185	5	PI3K-AKT/St55a
Xelaev18021291m	0.297708	5	PI3K-AKT/St55a
Xelaev18030798m	0.579094	5	PI3K-AKT/St55a
aldh1a2.S	0.768688	5	PI3K-AKT/St55a
ascl1.L	0.884169	5	PI3K-AKT/St55a
atad5.S	0.957849	5	PI3K-AKT/St55a
bnc1.S	0.607343	5	PI3K-AKT/St55a
ccna2.L	0.752511	5	PI3K-AKT/St55a
ccna2.S	0.607312	5	PI3K-AKT/St55a
ccnb1.2.L	0.783875	5	PI3K-AKT/St55a
ccnb1.2.S	0.770265	5	PI3K-AKT/St55a
ccnb2.S	0.74109	5	PI3K-AKT/St55a
ccnd1.L	1.04322	5	PI3K-AKT/St55a
ccnd1.S	0.677202	5	PI3K-AKT/St55a
ccnyl1.S	1.0767	5	PI3K-AKT/St55a
cdca7l.L	0.607564	5	PI3K-AKT/St55a
cdk2.L	0.578369	5	PI3K-AKT/St55a
cdk2.S	0.802862	5	PI3K-AKT/St55a
cry4.L	0.958371	5	PI3K-AKT/St55a
ctgf.L	0.441357	5	PI3K-AKT/St55a
ddr2.S	0.944888	5	PI3K-AKT/St55a
dll1.L	0.702696	5	PI3K-AKT/St55a
dmrta2.L	0.961283	5	PI3K-AKT/St55a
dmrta2.S	0.608677	5	PI3K-AKT/St55a
e2f1.L	0.875011	5	PI3K-AKT/St55a
ednrb.S	-0.019814	5	PI3K-AKT/St55a
ezh2.L	0.637058	5	PI3K-AKT/St55a
fam110a.L	0.464482	5	PI3K-AKT/St55a
fbxo5.L	0.736971	5	PI3K-AKT/St55a
fbxo5.S	0.467655	5	PI3K-AKT/St55a
foxm1.S	0.720727	5	PI3K-AKT/St55a
gja7.S	0.87099	5	PI3K-AKT/St55a
gli1.L	0.826651	5	PI3K-AKT/St55a
gli3.S	0.934089	5	PI3K-AKT/St55a
glul.L	0.969258	5	PI3K-AKT/St55a
glul.S	0.961602	5	PI3K-AKT/St55a
gpatch4.L	0.765161	5	PI3K-AKT/St55a
has2.L	1.28321	5	PI3K-AKT/St55a
hmga2.L	0.987236	5	PI3K-AKT/St55a
hmga2.S	0.881242	5	PI3K-AKT/St55a
hmox1.L	0.711075	5	PI3K-AKT/St55a
hmox1.S	0.710565	5	PI3K-AKT/St55a
iqgap3.L	1.25117	5	PI3K-AKT/St55a
isl2.S	0.732735	5	PI3K-AKT/St55a
lamb1.S	1.038	5	PI3K-AKT/St55a
limd2.L	0.765715	5	PI3K-AKT/St55a
lin28a.L	1.02253	5	PI3K-AKT/St55a
nkx2-1.L	1.01037	5	PI3K-AKT/St55a
nkx2-2.L	0.570111	5	PI3K-AKT/St55a
nkx2-2.S	0.695547	5	PI3K-AKT/St55a
pdia5.S	0.975636	5	PI3K-AKT/St55a
prrx1.L	0.885841	5	PI3K-AKT/St55a
rnaseh2b.L	0.372671	5	PI3K-AKT/St55a
rnf128.S	0.0607716	5	PI3K-AKT/St55a
rps9	0.352435	5	PI3K-AKT/St55a
s1pr3.L	1.06159	5	PI3K-AKT/St55a
sfrp2.S	0.42311	5	PI3K-AKT/St55a
shox2.S	1.00075	5	PI3K-AKT/St55a
sia2.S	1.49193	5	PI3K-AKT/St55a
six2.L	0.251162	5	PI3K-AKT/St55a
six2.S	0.195835	5	PI3K-AKT/St55a
tbx20.L	0.217721	5	PI3K-AKT/St55a
tgfb1.S	0.914099	5	PI3K-AKT/St55a
tgfbr3.S	0.794925	5	PI3K-AKT/St55a
tmem119.L	1.13186	5	PI3K-AKT/St55a
tmem119.S	0.132689	5	PI3K-AKT/St55a
ttk.S	1.22499	5	PI3K-AKT/St55a
twist1.L	0.38195	5	PI3K-AKT/St55a
twist1.S	1.07566	5	PI3K-AKT/St55a
wnt1.L	0.967208	5	PI3K-AKT/St55a
wnt10b.L	0.935444	5	PI3K-AKT/St55a
wnt10b.S	0.170802	5	PI3K-AKT/St55a
wwtr1.L	0.729916	5	PI3K-AKT/St55a
wwtr1.S	0.323088	5	PI3K-AKT/St55a
LOC108695787	0.490611	5	PI3K-AKT/St55a
LOC108696321	0.628895	5	PI3K-AKT/St55a
LOC108702783	1.14327	5	PI3K-AKT/St55a
LOC108704169	0.50483	5	PI3K-AKT/St55a
LOC108704892	0.692791	5	PI3K-AKT/St55a
LOC108704915	0.691678	5	PI3K-AKT/St55a
LOC108706593	1.18158	5	PI3K-AKT/St55a
LOC108706998	0.330705	5	PI3K-AKT/St55a
LOC108708494	0.686945	5	PI3K-AKT/St55a
LOC108708501	0.133073	5	PI3K-AKT/St55a
LOC108709815	0.531611	5	PI3K-AKT/St55a
LOC108711179	0.888012	5	PI3K-AKT/St55a
LOC108716914	0.760364	5	PI3K-AKT/St55a
LOC108717842	0.696993	5	PI3K-AKT/St55a
LOC108718095	0.773082	5	PI3K-AKT/St55a
LOC398292	0.404195	5	PI3K-AKT/St55a
MGC83023	0.81385	5	PI3K-AKT/St55a
Xelaev18007686m	0.317081	5	PI3K-AKT/St55a
Xelaev18021201m	0.535068	5	PI3K-AKT/St55a
Xelaev18021291m	1.14651	5	PI3K-AKT/St55a
Xelaev18030798m	0.820836	5	PI3K-AKT/St55a
aldh1a2.S	0.73927	5	PI3K-AKT/St55a
ascl1.L	0.768832	5	PI3K-AKT/St55a
atad5.S	0.570663	5	PI3K-AKT/St55a
bnc1.S	0.448936	5	PI3K-AKT/St55a
ccna2.L	0.57174	5	PI3K-AKT/St55a
ccna2.S	0.730232	5	PI3K-AKT/St55a
ccnb1.2.L	0.816626	5	PI3K-AKT/St55a
ccnb1.2.S	0.772294	5	PI3K-AKT/St55a
ccnb2.S	0.794653	5	PI3K-AKT/St55a
ccnd1.L	0.477427	5	PI3K-AKT/St55a
ccnd1.S	0.838659	5	PI3K-AKT/St55a
ccnyl1.S	0.526777	5	PI3K-AKT/St55a
cdca7l.L	0.960771	5	PI3K-AKT/St55a
cdk2.L	0.774912	5	PI3K-AKT/St55a
cdk2.S	0.671017	5	PI3K-AKT/St55a
cry4.L	0.662088	5	PI3K-AKT/St55a
ctgf.L	0.926145	5	PI3K-AKT/St55a
ddr2.S	0.479961	5	PI3K-AKT/St55a
dll1.L	0.786658	5	PI3K-AKT/St55a
dmrta2.L	0.667013	5	PI3K-AKT/St55a
dmrta2.S	0.907752	5	PI3K-AKT/St55a
e2f1.L	0.648839	5	PI3K-AKT/St55a
ednrb.S	1.29846	5	PI3K-AKT/St55a
ezh2.L	0.942385	5	PI3K-AKT/St55a
fam110a.L	0.631846	5	PI3K-AKT/St55a
fbxo5.L	0.730112	5	PI3K-AKT/St55a
fbxo5.S	0.657919	5	PI3K-AKT/St55a
foxm1.S	0.649878	5	PI3K-AKT/St55a
gja7.S	0.82988	5	PI3K-AKT/St55a
gli1.L	0.434044	5	PI3K-AKT/St55a
gli3.S	0.574126	5	PI3K-AKT/St55a
glul.L	0.756104	5	PI3K-AKT/St55a
glul.S	0.755399	5	PI3K-AKT/St55a
gpatch4.L	0.954258	5	PI3K-AKT/St55a
has2.L	0.0133702	5	PI3K-AKT/St55a
hmga2.L	0.735082	5	PI3K-AKT/St55a
hmga2.S	0.850237	5	PI3K-AKT/St55a
hmox1.L	0.936065	5	PI3K-AKT/St55a
hmox1.S	1.00673	5	PI3K-AKT/St55a
iqgap3.L	0.112708	5	PI3K-AKT/St55a
isl2.S	0.988322	5	PI3K-AKT/St55a
lamb1.S	0.660406	5	PI3K-AKT/St55a
limd2.L	0.955231	5	PI3K-AKT/St55a
lin28a.L	0.690329	5	PI3K-AKT/St55a
nkx2-1.L	0.680174	5	PI3K-AKT/St55a
nkx2-2.L	1.10765	5	PI3K-AKT/St55a
nkx2-2.S	1.00368	5	PI3K-AKT/St55a
pdia5.S	0.738514	5	PI3K-AKT/St55a
prrx1.L	0.703432	5	PI3K-AKT/St55a
rnaseh2b.L	1.07673	5	PI3K-AKT/St55a
rnf128.S	1.18975	5	PI3K-AKT/St55a
rps9	0.835671	5	PI3K-AKT/St55a
s1pr3.L	0.620191	5	PI3K-AKT/St55a
sfrp2.S	0.934128	5	PI3K-AKT/St55a
shox2.S	0.708416	5	PI3K-AKT/St55a
sia2.S	-0.42081	5	PI3K-AKT/St55a
six2.L	1.24719	5	PI3K-AKT/St55a
six2.S	1.33335	5	PI3K-AKT/St55a
tbx20.L	1.22432	5	PI3K-AKT/St55a
tgfb1.S	0.693553	5	PI3K-AKT/St55a
tgfbr3.S	0.65138	5	PI3K-AKT/St55a
tmem119.L	0.548082	5	PI3K-AKT/St55a
tmem119.S	1.31456	5	PI3K-AKT/St55a
ttk.S	0.150133	5	PI3K-AKT/St55a
twist1.L	1.00069	5	PI3K-AKT/St55a
twist1.S	0.460851	5	PI3K-AKT/St55a
wnt1.L	0.740098	5	PI3K-AKT/St55a
wnt10b.L	0.719543	5	PI3K-AKT/St55a
wnt10b.S	1.32572	5	PI3K-AKT/St55a
wwtr1.L	0.791873	5	PI3K-AKT/St55a
wwtr1.S	1.26695	5	PI3K-AKT/St55a
LOC108695787	0.19865	5	PI3K-AKT/St55a
LOC108696321	-0.632956	5	PI3K-AKT/St55a
LOC108702783	-0.0244278	5	PI3K-AKT/St55a
LOC108704169	-0.136862	5	PI3K-AKT/St55a
LOC108704892	-0.199492	5	PI3K-AKT/St55a
LOC108704915	-0.344358	5	PI3K-AKT/St55a
LOC108706593	-0.0178809	5	PI3K-AKT/St55a
LOC108706998	-0.605231	5	PI3K-AKT/St55a
LOC108708494	-0.645935	5	PI3K-AKT/St55a
LOC108708501	-0.487644	5	PI3K-AKT/St55a
LOC108709815	-0.618835	5	PI3K-AKT/St55a
LOC108711179	-0.144273	5	PI3K-AKT/St55a
LOC108716914	-0.645338	5	PI3K-AKT/St55a
LOC108717842	-0.0705085	5	PI3K-AKT/St55a
LOC108718095	0.217194	5	PI3K-AKT/St55a
LOC398292	-0.0317188	5	PI3K-AKT/St55a
MGC83023	-0.240186	5	PI3K-AKT/St55a
Xelaev18007686m	-0.284878	5	PI3K-AKT/St55a
Xelaev18021201m	-0.686322	5	PI3K-AKT/St55a
Xelaev18021291m	-0.195806	5	PI3K-AKT/St55a
Xelaev18030798m	0.0110112	5	PI3K-AKT/St55a
aldh1a2.S	-0.151637	5	PI3K-AKT/St55a
ascl1.L	-0.465296	5	PI3K-AKT/St55a
atad5.S	-0.221718	5	PI3K-AKT/St55a
bnc1.S	0.439261	5	PI3K-AKT/St55a
ccna2.L	0.122101	5	PI3K-AKT/St55a
ccna2.S	0.106929	5	PI3K-AKT/St55a
ccnb1.2.L	-0.332351	5	PI3K-AKT/St55a
ccnb1.2.S	-0.214274	5	PI3K-AKT/St55a
ccnb2.S	-0.20216	5	PI3K-AKT/St55a
ccnd1.L	-0.246727	5	PI3K-AKT/St55a
ccnd1.S	-0.170933	5	PI3K-AKT/St55a
ccnyl1.S	-0.429156	5	PI3K-AKT/St55a
cdca7l.L	-0.295319	5	PI3K-AKT/St55a
cdk2.L	0.081421	5	PI3K-AKT/St55a
cdk2.S	-0.0970234	5	PI3K-AKT/St55a
cry4.L	-0.403892	5	PI3K-AKT/St55a
ctgf.L	0.0277356	5	PI3K-AKT/St55a
ddr2.S	-0.0560237	5	PI3K-AKT/St55a
dll1.L	-0.120858	5	PI3K-AKT/St55a
dmrta2.L	-0.423409	5	PI3K-AKT/St55a
dmrta2.S	-0.185623	5	PI3K-AKT/St55a
e2f1.L	-0.190828	5	PI3K-AKT/St55a
ednrb.S	-0.141259	5	PI3K-AKT/St55a
ezh2.L	-0.310791	5	PI3K-AKT/St55a
fam110a.L	0.39631	5	PI3K-AKT/St55a
fbxo5.L	-0.082525	5	PI3K-AKT/St55a
fbxo5.S	0.363222	5	PI3K-AKT/St55a
foxm1.S	0.0626726	5	PI3K-AKT/St55a
gja7.S	-0.620003	5	PI3K-AKT/St55a
gli1.L	0.186224	5	PI3K-AKT/St55a
gli3.S	-0.179432	5	PI3K-AKT/St55a
glul.L	-0.8484	5	PI3K-AKT/St55a
glul.S	-0.734704	5	PI3K-AKT/St55a
gpatch4.L	-0.746308	5	PI3K-AKT/St55a
has2.L	-0.142021	5	PI3K-AKT/St55a
hmga2.L	-0.830934	5	PI3K-AKT/St55a
hmga2.S	-0.838372	5	PI3K-AKT/St55a
hmox1.L	-0.461894	5	PI3K-AKT/St55a
hmox1.S	-0.799383	5	PI3K-AKT/St55a
iqgap3.L	-0.18605	5	PI3K-AKT/St55a
isl2.S	-0.80904	5	PI3K-AKT/St55a
lamb1.S	-0.700631	5	PI3K-AKT/St55a
limd2.L	-0.759511	5	PI3K-AKT/St55a
lin28a.L	-0.782509	5	PI3K-AKT/St55a
nkx2-1.L	-0.636076	5	PI3K-AKT/St55a
nkx2-2.L	-0.696337	5	PI3K-AKT/St55a
nkx2-2.S	-0.669123	5	PI3K-AKT/St55a
pdia5.S	-0.727504	5	PI3K-AKT/St55a
prrx1.L	-0.316319	5	PI3K-AKT/St55a
rnaseh2b.L	-0.153994	5	PI3K-AKT/St55a
rnf128.S	0.00676524	5	PI3K-AKT/St55a
rps9	0.263749	5	PI3K-AKT/St55a
s1pr3.L	-0.648259	5	PI3K-AKT/St55a
sfrp2.S	0.0380881	5	PI3K-AKT/St55a
shox2.S	-0.720395	5	PI3K-AKT/St55a
sia2.S	-0.42738	5	PI3K-AKT/St55a
six2.L	-0.389393	5	PI3K-AKT/St55a
six2.S	-0.679141	5	PI3K-AKT/St55a
tbx20.L	-0.266108	5	PI3K-AKT/St55a
tgfb1.S	-0.361595	5	PI3K-AKT/St55a
tgfbr3.S	-0.0531156	5	PI3K-AKT/St55a
tmem119.L	-0.779129	5	PI3K-AKT/St55a
tmem119.S	-0.401858	5	PI3K-AKT/St55a
ttk.S	-0.1721	5	PI3K-AKT/St55a
twist1.L	-0.0216532	5	PI3K-AKT/St55a
twist1.S	-0.293838	5	PI3K-AKT/St55a
wnt1.L	-0.681433	5	PI3K-AKT/St55a
wnt10b.L	-0.482739	5	PI3K-AKT/St55a
wnt10b.S	-0.532043	5	PI3K-AKT/St55a
wwtr1.L	-0.176841	5	PI3K-AKT/St55a
wwtr1.S	-0.680264	5	PI3K-AKT/St55a
LOC108695787	-1.4587	5	PI3K-AKT/St55a
LOC108696321	-1.0477	5	PI3K-AKT/St55a
LOC108702783	-1.28964	5	PI3K-AKT/St55a
LOC108704169	-1.33696	5	PI3K-AKT/St55a
LOC108704892	-1.3326	5	PI3K-AKT/St55a
LOC108704915	-1.25595	5	PI3K-AKT/St55a
LOC108706593	-1.26246	5	PI3K-AKT/St55a
LOC108706998	-0.977782	5	PI3K-AKT/St55a
LOC108708494	-1.04764	5	PI3K-AKT/St55a
LOC108708501	-0.980651	5	PI3K-AKT/St55a
LOC108709815	-1.03589	5	PI3K-AKT/St55a
LOC108711179	-1.35015	5	PI3K-AKT/St55a
LOC108716914	-1.05721	5	PI3K-AKT/St55a
LOC108717842	-1.38865	5	PI3K-AKT/St55a
LOC108718095	-1.46076	5	PI3K-AKT/St55a
LOC398292	-1.3623	5	PI3K-AKT/St55a
MGC83023	-1.31528	5	PI3K-AKT/St55a
Xelaev18007686m	-1.20307	5	PI3K-AKT/St55a
Xelaev18021201m	-0.980599	5	PI3K-AKT/St55a
Xelaev18021291m	-1.24841	5	PI3K-AKT/St55a
Xelaev18030798m	-1.41094	5	PI3K-AKT/St55a
aldh1a2.S	-1.35632	5	PI3K-AKT/St55a
ascl1.L	-1.18771	5	PI3K-AKT/St55a
atad5.S	-1.30679	5	PI3K-AKT/St55a
bnc1.S	-1.49554	5	PI3K-AKT/St55a
ccna2.L	-1.44635	5	PI3K-AKT/St55a
ccna2.S	-1.44447	5	PI3K-AKT/St55a
ccnb1.2.L	-1.26815	5	PI3K-AKT/St55a
ccnb1.2.S	-1.32828	5	PI3K-AKT/St55a
ccnb2.S	-1.33358	5	PI3K-AKT/St55a
ccnd1.L	-1.27392	5	PI3K-AKT/St55a
ccnd1.S	-1.34493	5	PI3K-AKT/St55a
ccnyl1.S	-1.17432	5	PI3K-AKT/St55a
cdca7l.L	-1.27302	5	PI3K-AKT/St55a
cdk2.L	-1.4347	5	PI3K-AKT/St55a
cdk2.S	-1.37686	5	PI3K-AKT/St55a
cry4.L	-1.21657	5	PI3K-AKT/St55a
ctgf.L	-1.39524	5	PI3K-AKT/St55a
ddr2.S	-1.36883	5	PI3K-AKT/St55a
dll1.L	-1.3685	5	PI3K-AKT/St55a
dmrta2.L	-1.20489	5	PI3K-AKT/St55a
dmrta2.S	-1.33081	5	PI3K-AKT/St55a
e2f1.L	-1.33302	5	PI3K-AKT/St55a
ednrb.S	-1.13739	5	PI3K-AKT/St55a
ezh2.L	-1.26865	5	PI3K-AKT/St55a
fam110a.L	-1.49264	5	PI3K-AKT/St55a
fbxo5.L	-1.38456	5	PI3K-AKT/St55a
fbxo5.S	-1.4888	5	PI3K-AKT/St55a
foxm1.S	-1.43328	5	PI3K-AKT/St55a
gja7.S	-1.08087	5	PI3K-AKT/St55a
gli1.L	-1.44692	5	PI3K-AKT/St55a
gli3.S	-1.32878	5	PI3K-AKT/St55a
glul.L	-0.876962	5	PI3K-AKT/St55a
glul.S	-0.982296	5	PI3K-AKT/St55a
gpatch4.L	-0.973111	5	PI3K-AKT/St55a
has2.L	-1.15456	5	PI3K-AKT/St55a
hmga2.L	-0.891385	5	PI3K-AKT/St55a
hmga2.S	-0.893108	5	PI3K-AKT/St55a
hmox1.L	-1.18525	5	PI3K-AKT/St55a
hmox1.S	-0.917916	5	PI3K-AKT/St55a
iqgap3.L	-1.17782	5	PI3K-AKT/St55a
isl2.S	-0.912017	5	PI3K-AKT/St55a
lamb1.S	-0.997771	5	PI3K-AKT/St55a
limd2.L	-0.961435	5	PI3K-AKT/St55a
lin28a.L	-0.930352	5	PI3K-AKT/St55a
nkx2-1.L	-1.05447	5	PI3K-AKT/St55a
nkx2-2.L	-0.981426	5	PI3K-AKT/St55a
nkx2-2.S	-1.0301	5	PI3K-AKT/St55a
pdia5.S	-0.986646	5	PI3K-AKT/St55a
prrx1.L	-1.27295	5	PI3K-AKT/St55a
rnaseh2b.L	-1.2954	5	PI3K-AKT/St55a
rnf128.S	-1.25728	5	PI3K-AKT/St55a
rps9	-1.45185	5	PI3K-AKT/St55a
s1pr3.L	-1.03352	5	PI3K-AKT/St55a
sfrp2.S	-1.39533	5	PI3K-AKT/St55a
shox2.S	-0.988774	5	PI3K-AKT/St55a
sia2.S	-0.643742	5	PI3K-AKT/St55a
six2.L	-1.10896	5	PI3K-AKT/St55a
six2.S	-0.850049	5	PI3K-AKT/St55a
tbx20.L	-1.17593	5	PI3K-AKT/St55a
tgfb1.S	-1.24606	5	PI3K-AKT/St55a
tgfbr3.S	-1.39319	5	PI3K-AKT/St55a
tmem119.L	-0.900811	5	PI3K-AKT/St55a
tmem119.S	-1.04539	5	PI3K-AKT/St55a
ttk.S	-1.20302	5	PI3K-AKT/St55a
twist1.L	-1.36098	5	PI3K-AKT/St55a
twist1.S	-1.24267	5	PI3K-AKT/St55a
wnt1.L	-1.02587	5	PI3K-AKT/St55a
wnt10b.L	-1.17225	5	PI3K-AKT/St55a
wnt10b.S	-0.96448	5	PI3K-AKT/St55a
wwtr1.L	-1.34495	5	PI3K-AKT/St55a
wwtr1.S	-0.909775	5	PI3K-AKT/St55a
LOC108695816	-0.74536	6	PI3K-AKT/St55b
LOC108696785	-0.258296	6	PI3K-AKT/St55b
LOC108697830	0.405605	6	PI3K-AKT/St55b
LOC108700035	-0.701911	6	PI3K-AKT/St55b
LOC108701307	-0.04653	6	PI3K-AKT/St55b
LOC108701725	-0.0410294	6	PI3K-AKT/St55b
LOC108704509	-0.649494	6	PI3K-AKT/St55b
LOC108704596	-0.152159	6	PI3K-AKT/St55b
LOC108708144	-0.354513	6	PI3K-AKT/St55b
LOC108709364	-0.557861	6	PI3K-AKT/St55b
LOC108716897	-0.708771	6	PI3K-AKT/St55b
LOC108718407	-0.730016	6	PI3K-AKT/St55b
Xelaev18002855m	-0.337452	6	PI3K-AKT/St55b
adamts1.S	-0.539958	6	PI3K-AKT/St55b
atf3.S	-0.28197	6	PI3K-AKT/St55b
cd74.L	-0.668043	6	PI3K-AKT/St55b
cd74.S	-0.831155	6	PI3K-AKT/St55b
kdr.L	-0.074323	6	PI3K-AKT/St55b
myocd.S	-0.713051	6	PI3K-AKT/St55b
phldb3.L	-0.159049	6	PI3K-AKT/St55b
rictor.L	0.163778	6	PI3K-AKT/St55b
sds.S	-0.520938	6	PI3K-AKT/St55b
tert.L	-0.272614	6	PI3K-AKT/St55b
tgfa.L	-0.620597	6	PI3K-AKT/St55b
tirap.L	-0.665137	6	PI3K-AKT/St55b
LOC108695816	-0.778389	6	PI3K-AKT/St55b
LOC108696785	-0.977212	6	PI3K-AKT/St55b
LOC108697830	-1.48887	6	PI3K-AKT/St55b
LOC108700035	-0.83221	6	PI3K-AKT/St55b
LOC108701307	-0.883912	6	PI3K-AKT/St55b
LOC108701725	-0.745094	6	PI3K-AKT/St55b
LOC108704509	-0.675318	6	PI3K-AKT/St55b
LOC108704596	-1.33963	6	PI3K-AKT/St55b
LOC108708144	-0.990768	6	PI3K-AKT/St55b
LOC108709364	-1.0465	6	PI3K-AKT/St55b
LOC108716897	-0.784562	6	PI3K-AKT/St55b
LOC108718407	-0.808153	6	PI3K-AKT/St55b
Xelaev18002855m	-1.12683	6	PI3K-AKT/St55b
adamts1.S	-0.552396	6	PI3K-AKT/St55b
atf3.S	-0.980716	6	PI3K-AKT/St55b
cd74.L	-0.689648	6	PI3K-AKT/St55b
cd74.S	-0.834415	6	PI3K-AKT/St55b
kdr.L	-1.30497	6	PI3K-AKT/St55b
myocd.S	-0.988469	6	PI3K-AKT/St55b
phldb3.L	-1.29989	6	PI3K-AKT/St55b
rictor.L	-0.916507	6	PI3K-AKT/St55b
sds.S	-0.562093	6	PI3K-AKT/St55b
tert.L	-0.615045	6	PI3K-AKT/St55b
tgfa.L	-0.908223	6	PI3K-AKT/St55b
tirap.L	-0.958504	6	PI3K-AKT/St55b
LOC108695816	1.34396	6	PI3K-AKT/St55b
LOC108696785	1.39721	6	PI3K-AKT/St55b
LOC108697830	0.668161	6	PI3K-AKT/St55b
LOC108700035	1.33185	6	PI3K-AKT/St55b
LOC108701307	1.40959	6	PI3K-AKT/St55b
LOC108701725	1.42606	6	PI3K-AKT/St55b
LOC108704509	1.45125	6	PI3K-AKT/St55b
LOC108704596	0.932328	6	PI3K-AKT/St55b
LOC108708144	1.37542	6	PI3K-AKT/St55b
LOC108709364	1.19374	6	PI3K-AKT/St55b
LOC108716897	1.36597	6	PI3K-AKT/St55b
LOC108718407	1.33077	6	PI3K-AKT/St55b
Xelaev18002855m	1.25383	6	PI3K-AKT/St55b
adamts1.S	1.49662	6	PI3K-AKT/St55b
atf3.S	1.39341	6	PI3K-AKT/St55b
cd74.L	1.43925	6	PI3K-AKT/St55b
cd74.S	1.16885	6	PI3K-AKT/St55b
kdr.L	1.10214	6	PI3K-AKT/St55b
myocd.S	1.03366	6	PI3K-AKT/St55b
phldb3.L	1.06168	6	PI3K-AKT/St55b
rictor.L	1.33811	6	PI3K-AKT/St55b
sds.S	1.49708	6	PI3K-AKT/St55b
tert.L	1.48148	6	PI3K-AKT/St55b
tgfa.L	1.32179	6	PI3K-AKT/St55b
tirap.L	1.21229	6	PI3K-AKT/St55b
LOC108695816	0.179791	6	PI3K-AKT/St55b
LOC108696785	-0.1617	6	PI3K-AKT/St55b
LOC108697830	0.415104	6	PI3K-AKT/St55b
LOC108700035	0.202267	6	PI3K-AKT/St55b
LOC108701307	-0.479151	6	PI3K-AKT/St55b
LOC108701725	-0.639933	6	PI3K-AKT/St55b
LOC108704509	-0.126435	6	PI3K-AKT/St55b
LOC108704596	0.559463	6	PI3K-AKT/St55b
LOC108708144	-0.030142	6	PI3K-AKT/St55b
LOC108709364	0.410628	6	PI3K-AKT/St55b
LOC108716897	0.127358	6	PI3K-AKT/St55b
LOC108718407	0.207398	6	PI3K-AKT/St55b
Xelaev18002855m	0.210456	6	PI3K-AKT/St55b
adamts1.S	-0.404266	6	PI3K-AKT/St55b
atf3.S	-0.130727	6	PI3K-AKT/St55b
cd74.L	-0.0815636	6	PI3K-AKT/St55b
cd74.S	0.496724	6	PI3K-AKT/St55b
kdr.L	0.277159	6	PI3K-AKT/St55b
myocd.S	0.667864	6	PI3K-AKT/St55b
phldb3.L	0.397255	6	PI3K-AKT/St55b
rictor.L	-0.585377	6	PI3K-AKT/St55b
sds.S	-0.414046	6	PI3K-AKT/St55b
tert.L	-0.593819	6	PI3K-AKT/St55b
tgfa.L	0.20703	6	PI3K-AKT/St55b
tirap.L	0.411346	6	PI3K-AKT/St55b
LOC108696388	-0.455553	7	PI3K-AKT/St55c
LOC108700447	-0.205318	7	PI3K-AKT/St55c
LOC108700643	-0.570549	7	PI3K-AKT/St55c
LOC108702302	-0.395321	7	PI3K-AKT/St55c
LOC108702363	-0.691148	7	PI3K-AKT/St55c
LOC108702637	-0.77728	7	PI3K-AKT/St55c
LOC108707689	-1.06458	7	PI3K-AKT/St55c
LOC108708056	-0.321262	7	PI3K-AKT/St55c
LOC108709111	-0.943123	7	PI3K-AKT/St55c
LOC108709358	-0.873772	7	PI3K-AKT/St55c
LOC108709367	-0.971637	7	PI3K-AKT/St55c
LOC108714498	-0.220776	7	PI3K-AKT/St55c
LOC108716441	-0.550924	7	PI3K-AKT/St55c
MGC52622	-0.505953	7	PI3K-AKT/St55c
Xelaev18006371m	-0.484791	7	PI3K-AKT/St55c
Xelaev18035260m	-0.645999	7	PI3K-AKT/St55c
Xetrov90012787m.L	-0.608626	7	PI3K-AKT/St55c
aqp1.L	-0.837054	7	PI3K-AKT/St55c
bcl6.L	-0.695923	7	PI3K-AKT/St55c
bcl6.S	-0.56206	7	PI3K-AKT/St55c
ddr2.L	-0.580494	7	PI3K-AKT/St55c
dysf-like.L	-0.569552	7	PI3K-AKT/St55c
egr1.L	-1.06264	7	PI3K-AKT/St55c
egr1.S	-0.926808	7	PI3K-AKT/St55c
esr1.L	-0.535264	7	PI3K-AKT/St55c
esr1.S	-0.67649	7	PI3K-AKT/St55c
fgf1.S	-0.826049	7	PI3K-AKT/St55c
fosl2.L	-1.05415	7	PI3K-AKT/St55c
fosl2.S	-0.747051	7	PI3K-AKT/St55c
foxm1.L	-0.873954	7	PI3K-AKT/St55c
grem1.L	-1.02774	7	PI3K-AKT/St55c
htra1.L	-0.748473	7	PI3K-AKT/St55c
htra1.S	-0.772611	7	PI3K-AKT/St55c
igfbp2.S	-0.679852	7	PI3K-AKT/St55c
laptm4b.L	-0.769805	7	PI3K-AKT/St55c
nacc2.L	-0.625644	7	PI3K-AKT/St55c
nacc2.S	-0.633132	7	PI3K-AKT/St55c
nckap1l.L	-1.07327	7	PI3K-AKT/St55c
nodal1.S	-0.854766	7	PI3K-AKT/St55c
ptk2b.L	-0.662291	7	PI3K-AKT/St55c
ptk2b.S	-0.98549	7	PI3K-AKT/St55c
sox10.L	-0.668349	7	PI3K-AKT/St55c
sox10.S	-0.732685	7	PI3K-AKT/St55c
sp2.S	-0.84258	7	PI3K-AKT/St55c
tgfa.S	-0.855334	7	PI3K-AKT/St55c
LOC108696388	-1.12172	7	PI3K-AKT/St55c
LOC108700447	-1.14538	7	PI3K-AKT/St55c
LOC108700643	-0.946229	7	PI3K-AKT/St55c
LOC108702302	-0.742279	7	PI3K-AKT/St55c
LOC108702363	-1.02105	7	PI3K-AKT/St55c
LOC108702637	-0.892909	7	PI3K-AKT/St55c
LOC108707689	-0.614604	7	PI3K-AKT/St55c
LOC108708056	-1.25965	7	PI3K-AKT/St55c
LOC108709111	-0.736787	7	PI3K-AKT/St55c
LOC108709358	-0.857753	7	PI3K-AKT/St55c
LOC108709367	-0.460402	7	PI3K-AKT/St55c
LOC108714498	-1.11752	7	PI3K-AKT/St55c
LOC108716441	-0.485251	7	PI3K-AKT/St55c
MGC52622	-0.853957	7	PI3K-AKT/St55c
Xelaev18006371m	-1.11579	7	PI3K-AKT/St55c
Xelaev18035260m	-0.892638	7	PI3K-AKT/St55c
Xetrov90012787m.L	-1.05248	7	PI3K-AKT/St55c
aqp1.L	-0.773457	7	PI3K-AKT/St55c
bcl6.L	-0.440296	7	PI3K-AKT/St55c
bcl6.S	-0.570479	7	PI3K-AKT/St55c
ddr2.L	-0.605322	7	PI3K-AKT/St55c
dysf-like.L	-0.990592	7	PI3K-AKT/St55c
egr1.L	-0.607132	7	PI3K-AKT/St55c
egr1.S	-0.787487	7	PI3K-AKT/St55c
esr1.L	-0.658217	7	PI3K-AKT/St55c
esr1.S	-0.588999	7	PI3K-AKT/St55c
fgf1.S	-0.654639	7	PI3K-AKT/St55c
fosl2.L	-0.525813	7	PI3K-AKT/St55c
fosl2.S	-0.6842	7	PI3K-AKT/St55c
foxm1.L	-0.805393	7	PI3K-AKT/St55c
grem1.L	-0.595973	7	PI3K-AKT/St55c
htra1.L	-0.650582	7	PI3K-AKT/St55c
htra1.S	-0.646072	7	PI3K-AKT/St55c
igfbp2.S	-0.814482	7	PI3K-AKT/St55c
laptm4b.L	-0.678819	7	PI3K-AKT/St55c
nacc2.L	-0.641319	7	PI3K-AKT/St55c
nacc2.S	-0.650288	7	PI3K-AKT/St55c
nckap1l.L	-0.613254	7	PI3K-AKT/St55c
nodal1.S	-0.869086	7	PI3K-AKT/St55c
ptk2b.L	-0.77274	7	PI3K-AKT/St55c
ptk2b.S	-0.722145	7	PI3K-AKT/St55c
sox10.L	-0.856586	7	PI3K-AKT/St55c
sox10.S	-0.626412	7	PI3K-AKT/St55c
sp2.S	-0.699102	7	PI3K-AKT/St55c
tgfa.S	-0.773567	7	PI3K-AKT/St55c
LOC108696388	0.407625	7	PI3K-AKT/St55c
LOC108700447	0.069652	7	PI3K-AKT/St55c
LOC108700643	0.197668	7	PI3K-AKT/St55c
LOC108702302	-0.338305	7	PI3K-AKT/St55c
LOC108702363	0.772606	7	PI3K-AKT/St55c
LOC108702637	0.515889	7	PI3K-AKT/St55c
LOC108707689	0.640709	7	PI3K-AKT/St55c
LOC108708056	0.616598	7	PI3K-AKT/St55c
LOC108709111	0.560119	7	PI3K-AKT/St55c
LOC108709358	0.836682	7	PI3K-AKT/St55c
LOC108709367	0.0762607	7	PI3K-AKT/St55c
LOC108714498	0.0339816	7	PI3K-AKT/St55c
LOC108716441	-0.462776	7	PI3K-AKT/St55c
MGC52622	-0.0583168	7	PI3K-AKT/St55c
Xelaev18006371m	0.454553	7	PI3K-AKT/St55c
Xelaev18035260m	0.220601	7	PI3K-AKT/St55c
Xetrov90012787m.L	0.563889	7	PI3K-AKT/St55c
aqp1.L	0.355683	7	PI3K-AKT/St55c
bcl6.L	-0.347406	7	PI3K-AKT/St55c
bcl6.S	-0.36037	7	PI3K-AKT/St55c
ddr2.L	-0.299709	7	PI3K-AKT/St55c
dysf-like.L	0.291549	7	PI3K-AKT/St55c
egr1.L	0.602364	7	PI3K-AKT/St55c
egr1.S	0.6967	7	PI3K-AKT/St55c
esr1.L	-0.288709	7	PI3K-AKT/St55c
esr1.S	-0.202334	7	PI3K-AKT/St55c
fgf1.S	0.110712	7	PI3K-AKT/St55c
fosl2.L	0.363288	7	PI3K-AKT/St55c
fosl2.S	0.0265877	7	PI3K-AKT/St55c
foxm1.L	0.541811	7	PI3K-AKT/St55c
grem1.L	0.444201	7	PI3K-AKT/St55c
htra1.L	-0.0208388	7	PI3K-AKT/St55c
htra1.S	0.00958081	7	PI3K-AKT/St55c
igfbp2.S	0.131577	7	PI3K-AKT/St55c
laptm4b.L	0.0544815	7	PI3K-AKT/St55c
nacc2.L	-0.201587	7	PI3K-AKT/St55c
nacc2.S	-0.18069	7	PI3K-AKT/St55c
nckap1l.L	0.685406	7	PI3K-AKT/St55c
nodal1.S	0.74311	7	PI3K-AKT/St55c
ptk2b.L	0.0339267	7	PI3K-AKT/St55c
ptk2b.S	0.696802	7	PI3K-AKT/St55c
sox10.L	0.189381	7	PI3K-AKT/St55c
sox10.S	-0.0778177	7	PI3K-AKT/St55c
sp2.S	0.217251	7	PI3K-AKT/St55c
tgfa.S	0.400121	7	PI3K-AKT/St55c
LOC108696388	1.16964	7	PI3K-AKT/St55c
LOC108700447	1.28105	7	PI3K-AKT/St55c
LOC108700643	1.31911	7	PI3K-AKT/St55c
LOC108702302	1.4759	7	PI3K-AKT/St55c
LOC108702363	0.939597	7	PI3K-AKT/St55c
LOC108702637	1.1543	7	PI3K-AKT/St55c
LOC108707689	1.03847	7	PI3K-AKT/St55c
LOC108708056	0.964309	7	PI3K-AKT/St55c
LOC108709111	1.11979	7	PI3K-AKT/St55c
LOC108709358	0.894844	7	PI3K-AKT/St55c
LOC108709367	1.35578	7	PI3K-AKT/St55c
LOC108714498	1.30432	7	PI3K-AKT/St55c
LOC108716441	1.49895	7	PI3K-AKT/St55c
MGC52622	1.41823	7	PI3K-AKT/St55c
Xelaev18006371m	1.14603	7	PI3K-AKT/St55c
Xelaev18035260m	1.31804	7	PI3K-AKT/St55c
Xetrov90012787m.L	1.09722	7	PI3K-AKT/St55c
aqp1.L	1.25483	7	PI3K-AKT/St55c
bcl6.L	1.48362	7	PI3K-AKT/St55c
bcl6.S	1.49291	7	PI3K-AKT/St55c
ddr2.L	1.48553	7	PI3K-AKT/St55c
dysf-like.L	1.2686	7	PI3K-AKT/St55c
egr1.L	1.0674	7	PI3K-AKT/St55c
egr1.S	1.0176	7	PI3K-AKT/St55c
esr1.L	1.48219	7	PI3K-AKT/St55c
esr1.S	1.46782	7	PI3K-AKT/St55c
fgf1.S	1.36998	7	PI3K-AKT/St55c
fosl2.L	1.21668	7	PI3K-AKT/St55c
fosl2.S	1.40466	7	PI3K-AKT/St55c
foxm1.L	1.13754	7	PI3K-AKT/St55c
grem1.L	1.17951	7	PI3K-AKT/St55c
htra1.L	1.41989	7	PI3K-AKT/St55c
htra1.S	1.4091	7	PI3K-AKT/St55c
igfbp2.S	1.36276	7	PI3K-AKT/St55c
laptm4b.L	1.39414	7	PI3K-AKT/St55c
nacc2.L	1.46855	7	PI3K-AKT/St55c
nacc2.S	1.46411	7	PI3K-AKT/St55c
nckap1l.L	1.00112	7	PI3K-AKT/St55c
nodal1.S	0.980742	7	PI3K-AKT/St55c
ptk2b.L	1.4011	7	PI3K-AKT/St55c
ptk2b.S	1.01083	7	PI3K-AKT/St55c
sox10.L	1.33555	7	PI3K-AKT/St55c
sox10.S	1.43692	7	PI3K-AKT/St55c
sp2.S	1.32443	7	PI3K-AKT/St55c
tgfa.S	1.22878	7	PI3K-AKT/St55c
LOC108696784	-0.42117	8	PI3K-AKT/St61
LOC108697525	0.275657	8	PI3K-AKT/St61
LOC108699303	-0.382448	8	PI3K-AKT/St61
LOC108699393	0.333775	8	PI3K-AKT/St61
LOC108707308	-0.241472	8	PI3K-AKT/St61
LOC108707666	-0.144304	8	PI3K-AKT/St61
LOC108714389	0.469075	8	PI3K-AKT/St61
LOC108714508	-0.768449	8	PI3K-AKT/St61
LOC108715263	0.276806	8	PI3K-AKT/St61
LOC108715753	-0.509886	8	PI3K-AKT/St61
LOC108716152	-0.128124	8	PI3K-AKT/St61
LOC108716468	-0.725277	8	PI3K-AKT/St61
LOC108717007	-0.7502	8	PI3K-AKT/St61
LOC108717208	-0.231358	8	PI3K-AKT/St61
LOC108718405	0.50595	8	PI3K-AKT/St61
Xelaev18028298m	-0.613078	8	PI3K-AKT/St61
Xelaev18038135m	-0.741109	8	PI3K-AKT/St61
aadac.S	-0.860768	8	PI3K-AKT/St61
akr1b1.L	-0.473633	8	PI3K-AKT/St61
akr1b1.S	0.191268	8	PI3K-AKT/St61
atf3.L	0.241946	8	PI3K-AKT/St61
cga.S	-0.270474	8	PI3K-AKT/St61
ctgfl.L	-0.241229	8	PI3K-AKT/St61
cxcl12.L	0.0975954	8	PI3K-AKT/St61
cyr61.L	-0.510884	8	PI3K-AKT/St61
ddr1.L	0.156974	8	PI3K-AKT/St61
emp2.S	0.386765	8	PI3K-AKT/St61
ezh2.S	-0.0834156	8	PI3K-AKT/St61
fgf10.S	-0.160081	8	PI3K-AKT/St61
isl1.L	0.160595	8	PI3K-AKT/St61
mst1r.S	-0.595628	8	PI3K-AKT/St61
myb.S	0.536737	8	PI3K-AKT/St61
nes.S	0.468078	8	PI3K-AKT/St61
ntf3.L	-0.484502	8	PI3K-AKT/St61
osr1.S	-0.136104	8	PI3K-AKT/St61
pdcl3.L	-0.500263	8	PI3K-AKT/St61
pdcl3.S	-0.598515	8	PI3K-AKT/St61
rps9.L	-0.653838	8	PI3K-AKT/St61
sdcbp.S	-0.309846	8	PI3K-AKT/St61
sfrp1.L	0.525443	8	PI3K-AKT/St61
six1.L	0.057527	8	PI3K-AKT/St61
six1.S	-0.346857	8	PI3K-AKT/St61
slc35d1.L	0.0802984	8	PI3K-AKT/St61
tek.L	0.481864	8	PI3K-AKT/St61
tek.S	0.0931915	8	PI3K-AKT/St61
LOC108696784	0.743876	8	PI3K-AKT/St61
LOC108697525	0.543149	8	PI3K-AKT/St61
LOC108699303	0.207778	8	PI3K-AKT/St61
LOC108699393	-0.0909132	8	PI3K-AKT/St61
LOC108707308	0.811446	8	PI3K-AKT/St61
LOC108707666	1.24812	8	PI3K-AKT/St61
LOC108714389	-0.0292537	8	PI3K-AKT/St61
LOC108714508	0.622239	8	PI3K-AKT/St61
LOC108715263	-0.14494	8	PI3K-AKT/St61
LOC108715753	-0.319973	8	PI3K-AKT/St61
LOC108716152	1.07157	8	PI3K-AKT/St61
LOC108716468	0.105807	8	PI3K-AKT/St61
LOC108717007	1.05181	8	PI3K-AKT/St61
LOC108717208	0.213797	8	PI3K-AKT/St61
LOC108718405	-0.736731	8	PI3K-AKT/St61
Xelaev18028298m	1.29007	8	PI3K-AKT/St61
Xelaev18038135m	0.189607	8	PI3K-AKT/St61
aadac.S	0.726014	8	PI3K-AKT/St61
akr1b1.L	1.08875	8	PI3K-AKT/St61
akr1b1.S	0.908426	8	PI3K-AKT/St61
atf3.L	-0.512633	8	PI3K-AKT/St61
cga.S	0.14435	8	PI3K-AKT/St61
ctgfl.L	-0.480552	8	PI3K-AKT/St61
cxcl12.L	-0.00491428	8	PI3K-AKT/St61
cyr61.L	-0.383809	8	PI3K-AKT/St61
ddr1.L	0.0548717	8	PI3K-AKT/St61
emp2.S	0.704143	8	PI3K-AKT/St61
ezh2.S	0.603102	8	PI3K-AKT/St61
fgf10.S	1.24853	8	PI3K-AKT/St61
isl1.L	0.565249	8	PI3K-AKT/St61
mst1r.S	0.37174	8	PI3K-AKT/St61
myb.S	0.262187	8	PI3K-AKT/St61
nes.S	0.0518243	8	PI3K-AKT/St61
ntf3.L	1.42951	8	PI3K-AKT/St61
osr1.S	-0.588947	8	PI3K-AKT/St61
pdcl3.L	1.45608	8	PI3K-AKT/St61
pdcl3.S	0.881721	8	PI3K-AKT/St61
rps9.L	0.131071	8	PI3K-AKT/St61
sdcbp.S	1.01287	8	PI3K-AKT/St61
sfrp1.L	-0.391093	8	PI3K-AKT/St61
six1.L	0.831356	8	PI3K-AKT/St61
six1.S	0.86061	8	PI3K-AKT/St61
slc35d1.L	-0.0135547	8	PI3K-AKT/St61
tek.L	-0.0587305	8	PI3K-AKT/St61
tek.S	-0.180342	8	PI3K-AKT/St61
LOC108696784	0.891546	8	PI3K-AKT/St61
LOC108697525	0.661527	8	PI3K-AKT/St61
LOC108699303	1.26956	8	PI3K-AKT/St61
LOC108699393	1.07248	8	PI3K-AKT/St61
LOC108707308	0.744773	8	PI3K-AKT/St61
LOC108707666	0.0853425	8	PI3K-AKT/St61
LOC108714389	0.93819	8	PI3K-AKT/St61
LOC108714508	1.076	8	PI3K-AKT/St61
LOC108715263	1.13691	8	PI3K-AKT/St61
LOC108715753	1.48575	8	PI3K-AKT/St61
LOC108716152	0.362021	8	PI3K-AKT/St61
LOC108716468	1.37531	8	PI3K-AKT/St61
LOC108717007	0.650879	8	PI3K-AKT/St61
LOC108717208	1.21307	8	PI3K-AKT/St61
LOC108718405	1.15813	8	PI3K-AKT/St61
Xelaev18028298m	0.265939	8	PI3K-AKT/St61
Xelaev18038135m	1.33941	8	PI3K-AKT/St61
aadac.S	0.995521	8	PI3K-AKT/St61
akr1b1.L	0.529432	8	PI3K-AKT/St61
akr1b1.S	0.3258	8	PI3K-AKT/St61
atf3.L	1.2847	8	PI3K-AKT/St61
cga.S	1.26682	8	PI3K-AKT/St61
ctgfl.L	1.46778	8	PI3K-AKT/St61
cxcl12.L	1.17558	8	PI3K-AKT/St61
cyr61.L	1.49412	8	PI3K-AKT/St61
ddr1.L	1.10855	8	PI3K-AKT/St61
emp2.S	0.39251	8	PI3K-AKT/St61
ezh2.S	0.85691	8	PI3K-AKT/St61
fgf10.S	0.0973216	8	PI3K-AKT/St61
isl1.L	0.730531	8	PI3K-AKT/St61
mst1r.S	1.22594	8	PI3K-AKT/St61
myb.S	0.678507	8	PI3K-AKT/St61
nes.S	0.889629	8	PI3K-AKT/St61
ntf3.L	-0.101536	8	PI3K-AKT/St61
osr1.S	1.45151	8	PI3K-AKT/St61
pdcl3.L	-0.18401	8	PI3K-AKT/St61
pdcl3.S	0.813448	8	PI3K-AKT/St61
rps9.L	1.36108	8	PI3K-AKT/St61
sdcbp.S	0.551523	8	PI3K-AKT/St61
sfrp1.L	1.06462	8	PI3K-AKT/St61
six1.L	0.532923	8	PI3K-AKT/St61
six1.S	0.744889	8	PI3K-AKT/St61
slc35d1.L	1.18956	8	PI3K-AKT/St61
tek.L	0.944901	8	PI3K-AKT/St61
tek.S	1.2591	8	PI3K-AKT/St61
LOC108696784	-1.21425	8	PI3K-AKT/St61
LOC108697525	-1.48033	8	PI3K-AKT/St61
LOC108699303	-1.09489	8	PI3K-AKT/St61
LOC108699393	-1.31534	8	PI3K-AKT/St61
LOC108707308	-1.31475	8	PI3K-AKT/St61
LOC108707666	-1.18916	8	PI3K-AKT/St61
LOC108714389	-1.37801	8	PI3K-AKT/St61
LOC108714508	-0.929794	8	PI3K-AKT/St61
LOC108715263	-1.26878	8	PI3K-AKT/St61
LOC108715753	-0.655889	8	PI3K-AKT/St61
LOC108716152	-1.30547	8	PI3K-AKT/St61
LOC108716468	-0.755842	8	PI3K-AKT/St61
LOC108717007	-0.952493	8	PI3K-AKT/St61
LOC108717208	-1.19551	8	PI3K-AKT/St61
LOC108718405	-0.927349	8	PI3K-AKT/St61
Xelaev18028298m	-0.942933	8	PI3K-AKT/St61
Xelaev18038135m	-0.787906	8	PI3K-AKT/St61
aadac.S	-0.860768	8	PI3K-AKT/St61
akr1b1.L	-1.14455	8	PI3K-AKT/St61
akr1b1.S	-1.42549	8	PI3K-AKT/St61
atf3.L	-1.01401	8	PI3K-AKT/St61
cga.S	-1.14069	8	PI3K-AKT/St61
ctgfl.L	-0.745996	8	PI3K-AKT/St61
cxcl12.L	-1.26826	8	PI3K-AKT/St61
cyr61.L	-0.599423	8	PI3K-AKT/St61
ddr1.L	-1.3204	8	PI3K-AKT/St61
emp2.S	-1.48342	8	PI3K-AKT/St61
ezh2.S	-1.3766	8	PI3K-AKT/St61
fgf10.S	-1.18578	8	PI3K-AKT/St61
isl1.L	-1.45637	8	PI3K-AKT/St61
mst1r.S	-1.00205	8	PI3K-AKT/St61
myb.S	-1.47743	8	PI3K-AKT/St61
nes.S	-1.40953	8	PI3K-AKT/St61
ntf3.L	-0.843473	8	PI3K-AKT/St61
osr1.S	-0.726457	8	PI3K-AKT/St61
pdcl3.L	-0.771812	8	PI3K-AKT/St61
pdcl3.S	-1.09665	8	PI3K-AKT/St61
rps9.L	-0.838315	8	PI3K-AKT/St61
sdcbp.S	-1.25455	8	PI3K-AKT/St61
sfrp1.L	-1.19897	8	PI3K-AKT/St61
six1.L	-1.42181	8	PI3K-AKT/St61
six1.S	-1.25864	8	PI3K-AKT/St61
slc35d1.L	-1.25631	8	PI3K-AKT/St61
tek.L	-1.36803	8	PI3K-AKT/St61
tek.S	-1.17195	8	PI3K-AKT/St61
